# Supplementary material for: Local Molecular Reactivity of the Colored Dansylglycine in Water and Dioxane Studied through Conceptual DFT
Source: Hindawi journal article supplement (doi:10.1155/2018/3172412), 2018-07-15
Supplement: f1 [file 3172412.f1.pdf]

Local Molecular Reactivity of the Colored Dansylglycine in  
Water and Dioxane Studied through Conceptual DFT  
Supplementary Information

Table S1: Calculated bond lengths (in Å) of the dansylglycine molecule with the MN12SX density functional using water as a solvent simulated with the SMD solvation model

| Bond    | Distance | Bond     | Distance | Bond     | Distance | Bond     | Distance |
|---------|----------|----------|----------|----------|----------|----------|----------|
| R(1-2)  | 1.475    | R(7-20)  | 1.466    | R(12-22) | 1.091    | R(18-30) | 1.102    |
| R(1-3)  | 1.480    | R(7-28)  | 1.041    | R(13-16) | 1.376    | R(18-31) | 1.103    |
| R(1-7)  | 1.710    | R(8-9)   | 1.428    | R(13-23) | 1.097    | R(19-32) | 1.103    |
| R(1-10) | 1.691    | R(8-10)  | 1.439    | R(14-16) | 1.411    | R(19-33) | 1.102    |
| R(4-21) | 1.362    | R(8-12)  | 1.426    | R(14-24) | 1.100    | R(19-34) | 1.102    |
| R(4-37) | 1.016    | R(9-11)  | 1.448    | R(15-17) | 1.413    | R(20-21) | 1.513    |
| R(5-21) | 1.221    | R(9-13)  | 1.427    | R(15-25) | 1.092    | R(20-35) | 1.133    |
| R(6-11) | 1.452    | R(10-14) | 1.386    | R(16-26) | 1.093    | R(20-36) | 1.125    |
| R(6-18) | 1.493    | R(11-15) | 1.384    | R(17-27) | 1.095    |          |          |
| R(6-19) | 1.497    | R(12-17) | 1.376    | R(18-29) | 1.104    |          |          |

Table S2: Calculated bond angles (in  $^{\circ}$ ) of the dansylglycine molecule with the MN12SX density functional using water as a solvent simulated with the SMD solvation model

| Bond       | Angle | Bond       | Angle | Bond        | Angle | Bond        | Angle |
|------------|-------|------------|-------|-------------|-------|-------------|-------|
| A(2-1-3)   | 112.7 | A(6-11-9)  | 117.6 | A(8-9-13)   | 118.8 | A(16-13-23) | 119.2 |
| A(2-1-7)   | 105.0 | A(6-11-15) | 122.6 | A(10-8-12)  | 121.9 | A(13-16-14) | 120.2 |
| A(2-1-10)  | 112.0 | A(18-6-19) | 110.0 | A(8-10-14)  | 120.0 | A(13-16-26) | 120.8 |
| A(3-1-7)   | 107.3 | A(6-18-29) | 108.8 | A(8-12-17)  | 120.5 | A(16-14-24) | 117.5 |
| A(3-1-10)  | 110.9 | A(6-18-30) | 115.4 | A(8-12-22)  | 121.4 | A(14-16-26) | 119.0 |
| A(7-1-10)  | 108.6 | A(6-18-31) | 110.2 | A(11-9-13)  | 122.1 | A(17-15-25) | 118.1 |
| A(1-7-20)  | 118.0 | A(6-19-32) | 109.2 | A(9-11-15)  | 119.7 | A(15-17-27) | 118.7 |
| A(1-7-28)  | 117.5 | A(6-19-33) | 114.1 | A(9-13-16)  | 121.2 | A(29-18-30) | 107.2 |
| A(1-10-8)  | 119.2 | A(6-19-34) | 111.2 | A(9-13-23)  | 119.6 | A(29-18-31) | 106.8 |
| A(1-10-14) | 120.8 | A(20-7-28) | 112.2 | A(10-14-16) | 120.8 | A(30-18-31) | 108.1 |
| A(21-4-37) | 113.6 | A(7-20-21) | 115.7 | A(10-14-24) | 121.7 | A(32-19-33) | 107.6 |
| A(4-21-5)  | 120.1 | A(7-20-35) | 109.0 | A(11-15-17) | 120.5 | A(32-19-34) | 107.0 |
| A(4-21-20) | 112.9 | A(7-20-36) | 111.7 | A(11-15-25) | 121.4 | A(33-19-34) | 107.4 |
| A(5-21-20) | 127.0 | A(9-8-10)  | 119.0 | A(17-12-22) | 118.1 | A(21-20-35) | 107.1 |
| A(11-6-18) | 113.9 | A(9-8-12)  | 119.1 | A(12-17-15) | 121.0 | A(21-20-36) | 109.2 |
| A(11-6-19) | 111.2 | A(8-9-11)  | 119.1 | A(12-17-27) | 120.3 | A(35-20-36) | 103.2 |

Table S3: Calculated bond lengths (in Å) of the dansylglycine molecule with the MN12SX density functional using dioxane as a solvent simulated with the SMD solvation model

| Bond    | Distance | Bond     | Distance | Bond     | Distance | Bond     | Distance |
|---------|----------|----------|----------|----------|----------|----------|----------|
| R(1-2)  | 1.455    | R(7-20)  | 1.466    | R(12-22) | 1.098    | R(18-30) | 1.101    |
| R(1-3)  | 1.452    | R(7-28)  | 1.034    | R(13-16) | 1.376    | R(18-31) | 1.104    |
| R(1-7)  | 1.734    | R(8-9)   | 1.428    | R(13-23) | 1.097    | R(19-32) | 1.104    |
| R(1-10) | 1.719    | R(8-10)  | 1.431    | R(14-16) | 1.413    | R(19-33) | 1.102    |
| R(4-21) | 1.369    | R(8-12)  | 1.429    | R(14-24) | 1.100    | R(19-34) | 1.102    |
| R(4-37) | 1.000    | R(9-11)  | 1.448    | R(15-17) | 1.418    | R(20-21) | 1.520    |
| R(5-21) | 1.208    | R(9-13)  | 1.426    | R(15-25) | 1.089    | R(20-35) | 1.124    |
| R(6-11) | 1.450    | R(10-14) | 1.383    | R(16-26) | 1.090    | R(20-36) | 1.121    |
| R(6-18) | 1.490    | R(11-15) | 1.381    | R(17-27) | 1.093    |          |          |
| R(6-19) | 1.494    | R(12-17) | 1.372    | R(18-29) | 1.104    |          |          |

Table S4: Calculated bond angles (in  $^{\circ}$ ) of the dansylglycine molecule with the MN12SX density functional using dioxane as a solvent simulated with the SMD solvation model

| Bond       | Angle | Bond       | Angle | Bond        | Angle | Bond        | Angle |
|------------|-------|------------|-------|-------------|-------|-------------|-------|
| A(2-1-3)   | 118.4 | A(6-11-9)  | 116.6 | A(8-9-13)   | 119.3 | A(16-13-23) | 120.0 |
| A(2-1-7)   | 103.9 | A(6-11-15) | 123.3 | A(10-8-12)  | 122.8 | A(13-16-14) | 119.8 |
| A(2-1-10)  | 109.8 | A(18-6-19) | 111.0 | A(8-10-14)  | 120.3 | A(13-16-26) | 120.9 |
| A(3-1-7)   | 107.8 | A(6-18-29) | 108.4 | A(8-12-17)  | 120.8 | A(16-14-24) | 118.2 |
| A(3-1-10)  | 112.5 | A(6-18-30) | 115.3 | A(8-12-22)  | 120.2 | A(14-16-26) | 119.2 |
| A(7-1-10)  | 102.9 | A(6-18-31) | 109.9 | A(11-9-13)  | 121.6 | A(17-15-25) | 118.3 |
| A(1-7-20)  | 118.6 | A(6-19-32) | 108.7 | A(9-11-15)  | 120.0 | A(15-17-27) | 118.5 |
| A(1-7-28)  | 116.5 | A(6-19-33) | 114.1 | A(9-13-16)  | 120.9 | A(29-18-30) | 107.8 |
| A(1-10-8)  | 123.1 | A(6-19-34) | 110.8 | A(9-13-23)  | 119.1 | A(29-18-31) | 106.8 |
| A(1-10-14) | 116.6 | A(20-7-28) | 111.5 | A(10-14-16) | 121.0 | A(30-18-31) | 108.3 |
| A(21-4-37) | 112.9 | A(7-20-21) | 115.3 | A(10-14-24) | 120.8 | A(32-19-33) | 108.1 |
| A(4-21-5)  | 120.6 | A(7-20-35) | 109.0 | A(11-15-17) | 120.1 | A(32-19-34) | 107.3 |
| A(4-21-20) | 111.3 | A(7-20-36) | 110.9 | A(11-15-25) | 121.5 | A(33-19-34) | 107.6 |
| A(5-21-20) | 128.1 | A(9-8-10)  | 118.5 | A(17-12-22) | 119.0 | A(21-20-35) | 107.5 |
| A(11-6-18) | 114.4 | A(9-8-12)  | 118.7 | A(12-17-15) | 121.1 | A(21-20-36) | 108.5 |
| A(11-6-19) | 112.0 | A(8-9-11)  | 119.1 | A(12-17-27) | 120.4 | A(35-20-36) | 105.0 |
